# Supplementary material
Source: publisher figshare collection journal article supplement (https://gsajournals.figshare.com/ndownloader/files/24436838)
Supplement: Supplementary file 1 [file 24436838]

**Table S1 Illumina sequencing reads used for genome size estimation and the correction of the genome assembly**

| Library | Data (Gb) | Depth (×) | Q20 (%) | Q30 (%) |
| --- | --- | --- | --- | --- |
| 350 bp | 54.55 | 83.26 | 97.33 | 92.76 |
| Total | 54.55 | 83.26 | --- | --- |

**Table S2 Size distributions of the PacBio subreads**

| Length (bp) | Number (bp) | Total Length (bp) | Average Length (bp) |
| --- | --- | --- | --- |
| 500–2,000 | 638,299 | 769,627,686 | 1,205.75 |
| 2,000–4,000 | 613,551 | 1,806,954,490 | 2,945.08 |
| 4,000–6,000 | 469,478 | 2,330,983,492 | 4,965.05 |
| 6,000–8,000 | 397,190 | 2,771,110,809 | 6,976.79 |
| 8,000–10,000 | 350,922 | 3,151,254,832 | 8,979.93 |
| 10,000–12,000 | 315,116 | 3,459,904,616 | 10,979.78 |
| 12,000–14,000 | 279,637 | 3,629,020,526 | 12,977.61 |
| 14,000–16,000 | 244,232 | 3,657,754,402 | 14,976.56 |
| 16,000–18,000 | 215,024 | 3,651,178,915 | 16,980.33 |
| >18,000 | 1,472,248 | 41,754,242,787 | 28,360.88 |
| Total | 4,995,697 | 66,982,032,555 | 13,408 |

**Table S3 Statistical details of the PacBio subreads**

| **Type** | **Reads_num** | **Total_base (bp)** | **Read_N50** | **Mean** | **Maximum** |
| --- | --- | --- | --- | --- | --- |
| Sequel | 4,995,697 | 66,982,032,555 | 22,633 | 13,408 | 90,903 |

**Table S4 The initial C. mollissima assembly, as generated by different tools**

| **Assembly tools** | **WTGB** | **Canu** | **WTGB+Canu (merge)** |
| --- | --- | --- | --- |
| Genome size (bp) | 782,890,668 | 994,461,872 | 793,805,471 |
| Contig number | 2,527 | 4,217 | 1,381 |
| Maximum contig length (bp) | 5,709,809 | 5,367,888 | 25,283,183 |
| Contig N50 (bp) | 1,046,151 | 579,746 | 3,382,036 |
| Contig N90 (bp) | 96,478 | 83,619 | 182,580 |
| GC content (%) | 35.13 | 35.10 | 35.09 |

**Table S5 Statistical details of the Hi-C library data**

| **library-ID** | **Read Pairs Number** | **Base Number** | **GC Content (%)** | **≥Q30 (%)** | **Depth** |
| --- | --- | --- | --- | --- | --- |
| Hi-C01 | 370,041,098 | 110,833,450,402 | 37.66 | 91.85 | 170× |

**Table S6 Details of the alignment of the clean Hi-C data to the initial assembly**

| **Mapping Type** | **Number** | **Ratio (%)** |
| --- | --- | --- |
| Total read pairs | 370,041,098 | 100 |
| Mapped reads | 663,321,111 | 89.63 |
| Unique mapped read pairs | 210,652,422 | 56.93 |

**Table S7 Statistical details of all types of Hi-C sequencing pairs**

| **Type** | **Number** | **Ratio (%)** |
| --- | --- | --- |
| Unique paired alignments | 210,652,422 | 100 |
| Valid interaction pairs | 161,128,476 | 76.49 |
| Dangling end pairs | 10,555,700 | 5.01 |
| Re-ligation pairs | 2,518,240 | 1.2 |
| Self-cycle pairs | 25,336,948 | 12.03 |
| Dumped pairs | 11,113,058 | 5.28 |

**Table S8 Evaluation using BUSCO**

| **Species** | **Complete BUSCOs** | **Complete and single-copy BUSCOs** | **Complete and duplicated BUSCOs** | **Fragmented BUSCOs** | **Missing BUSCOs** |
| --- | --- | --- | --- | --- | --- |
| chestnut | 1,492 (92.44%) | 1,433 (88.79%) | 59 (3.66%) | 24 (1.49%) | 98 (6.07%) |

**Table S9 Alignment of the Illumina reads to the C. mollissima genome assembly**

| **Library** | **Total reads** | **Mapped reads** | **Mapped (%)** | **Properly mapped reads** | **Properly mapped (%)** |
| --- | --- | --- | --- | --- | --- |
| 350bp | 422,116,203 | 415,232,639 | 98.37 | 387,854,968 | 93.08 |

**Table S10 Functional annotation of the predicted protein-coding genes**

| **Database** | **Number of genes annotated** | **Percentage (%)** |
| --- | --- | --- |
| GO | 16,709 | 49.67% |
| KEGG | 9,388 | 27.91% |
| KOG | 19,248 | 57.22% |
| TrEMBL | 32,825 | 97.58% |
| Nr | 32,844 | 97.64% |
| All | 32,874 | 97.73% |

GO: Gene Ontology; KEGG: Kyoto Encyclopedia of Genes and Genomes; KOG: eukaryotic orthologous groups of proteins; Nr：GenBank non-redundant protein database

**Table S11 Castanea mollissima gene prediction**

| **Method** | **Software** | **Species** | **Number of genes** |
| --- | --- | --- | --- |
| *Ab initio* | Genscan | - | 23,855 |
| Augustus | - | 35,934 |
| GlimmerHMM | - | 27,074 |
| GeneID | - | 42,283 |
| SNAP | - | 14,071 |
| Homology-based | GeMoMa | *Arabidopsis thaliana* | 24,250 |
| *Oryza sativa* | 25,274 |
| European ash | 25,855 |
| *Quercus suber* | 42,632 |
| RNA-seq | PASA | *-* | 29,117 |
| TransDecoder | *-* | 46,795 |
| GeneMarkS-T | *-* | 28,020 |
| Integration | EVM | - | 33,638 |

**Table S12 Statistical details of the identified genes**

| **Software** | **Gene Num** | **GeneLen**  **(bp)** | **AveGeneLen(bp)** | **ExonLen**  **(bp)** | **AveExonLen(bp)** | **IntronLen**  **(bp)** | **AveIntronLen(bp)** |
| --- | --- | --- | --- | --- | --- | --- | --- |
| EVM | 33,638 | 157,948,859 | 4,695.54 | 42,540,186 | 252.51 | 115,408,673 | 685.05 |

**Table S13 Statistical details of the identified repeat sequences**

| **Type** | **Number** | **Length（bp）** | **Percentage (%)** |
| --- | --- | --- | --- |
| ClassI | 423,675 | 235,886,704 | 34.24 |
| ClassI/DIRS | 13,697 | 12,004,658 | 1.74 |
| ClassI/LARD | 12,837 | 3,961,957 | 0.58 |
| ClassI/LINE | 123,740 | 46,315,237 | 6.72 |
| ClassI/LTR/Copia | 111,135 | 59,762,237 | 8.67 |
| ClassI/LTR/Gypsy | 136,445 | 106,363,325 | 15.44 |
| ClassI/LTR/Unknown | 1,146 | 398,253 | 0.06 |
| ClassI/PLE | 526 | 133,012 | 0.02 |
| ClassI/SINE | 4,981 | 957,920 | 0.14 |
| ClassI/TRIM | 2,422 | 1,458,016 | 0.21 |
| ClassI/Unknown | 16,746 | 4,532,112 | 0.66 |
| ClassII | 101,191 | 38,048,432 | 5.52 |
| ClassII/Crypton | 9 | 637 | 0 |
| ClassII/Helitron | 40,400 | 12,826,319 | 1.86 |
| ClassII/MITE | 1,630 | 422,650 | 0.06 |
| ClassII/Maverick | 1,218 | 362,292 | 0.05 |
| ClassII/TIR | 54,312 | 23,681,234 | 3.44 |
| ClassII/Unknown | 3,622 | 755,300 | 0.11 |
| PotentialHostGene | 89,112 | 21,644,354 | 3.14 |
| SSR | 720 | 160,173 | 0.02 |
| Unknown | 278,155 | 71,100,097 | 10.32 |
| Total | 892,853 | 366,839,546 | 53.24 |


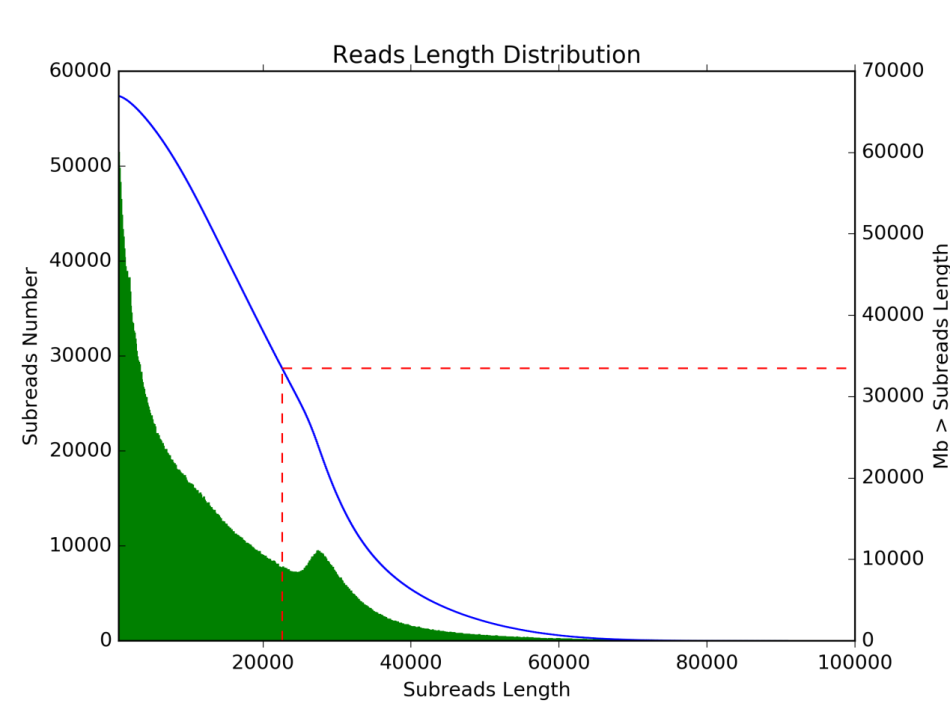


**Fig S1. Distribution of subread lengths**

The red dotted line represents the N50 length of subreads.


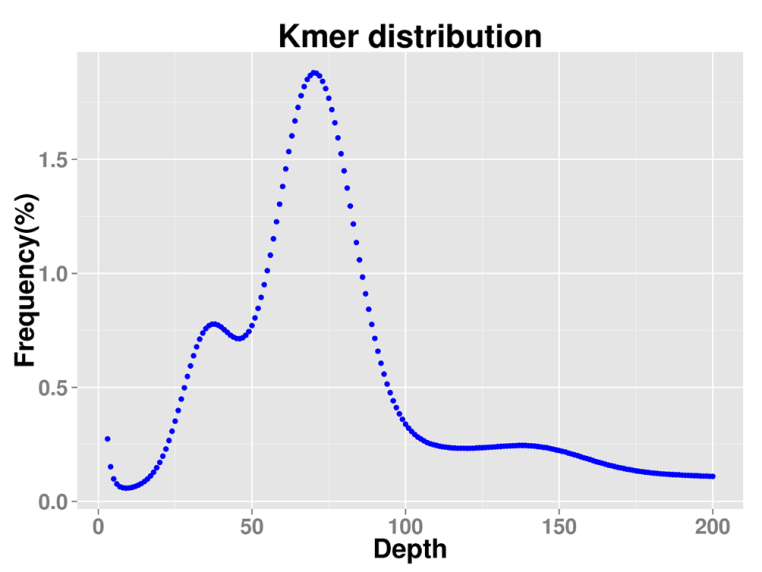


**Figure S2 Nineteen-k-mer estimation of genome size**

The genome size of *Castanea mollissima* was estimated based on Illumina genomic reads from insert size of ~350 bp library.


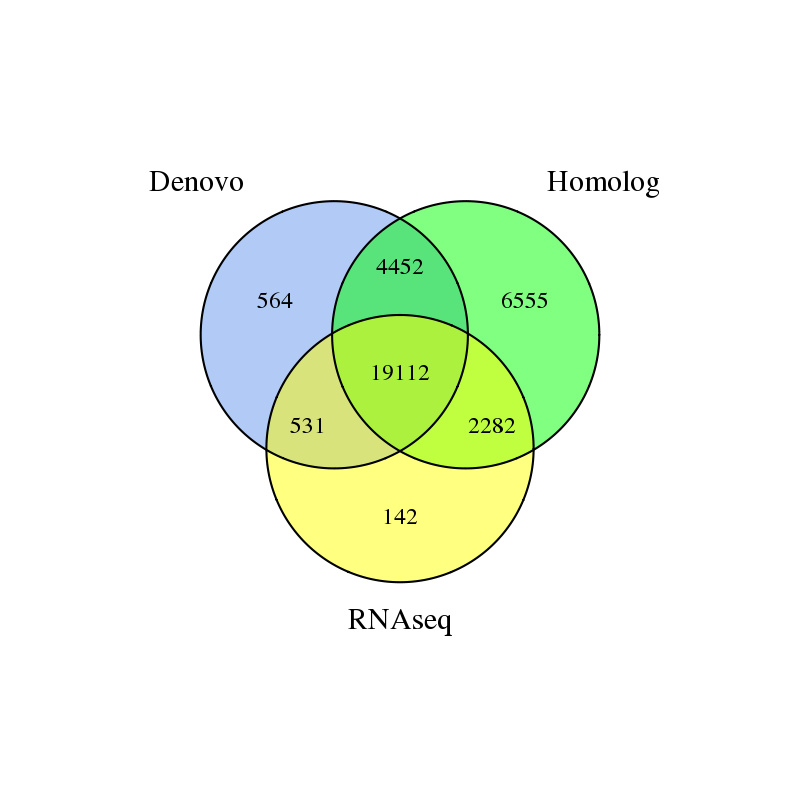


**Fig S3 Differences in the genes predicted by the *Ab initio*, homolog, and RNA-sequencing methods**
